# Supplementary material
Source: Springer Nature journal article supplement (https://www.springermedizin.de/resource/supplementary/12936_2012_2533_MOESM12_ESM.pdf/9543200)

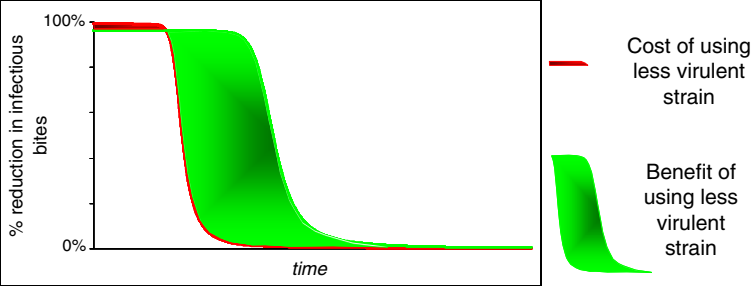

Supplement: MOESM12 [file 9543200]
